# Supplementary material for: Cataloging health state utility estimates for Duchenne muscular dystrophy and related conditions
Source: Springer Nature journal article supplement (doi:10.1186/s12955-024-02287-2), 2024-09-02
Supplement: MOESM1 [file 12955_2024_2287_MOESM1_ESM.pdf]

**Title:** Cataloging Health State Utility Estimates for Duchenne Muscular Dystrophy and Related Conditions

**Corresponding Author:**

Lauren A. Do, MS  
Center for the Evaluation of Value and Risk in Health  
Institute for Clinical Research and Health Policy Studies  
Tufts Medical Center  
Boston, Massachusetts  
USA  
laurenatdo@gmail.com

**Co-Authors:**

Lauren E. Sedita, MS  
Sarepta Therapeutics, Inc.  
Cambridge, MA  
USA

Alexa C. Klimchak, MA, SB  
Sarepta Therapeutics, Inc.  
Cambridge, MA  
USA

Rachel Salazar, PT, DPT  
Sarepta Therapeutics, Inc.  
Cambridge, MA  
USA

David D. Kim, PhD  
Section of Hospital Medicine  
Department of Medicine  
The University of Chicago  
Chicago, IL  
USA

## Supplemental Materials

### Contents

|                                                                                                                                                                                                                              |    |
|------------------------------------------------------------------------------------------------------------------------------------------------------------------------------------------------------------------------------|----|
| Table S1: Search terms for Analysis Two .....                                                                                                                                                                                | 3  |
| Table S2: Data extracted on included utility records .....                                                                                                                                                                   | 4  |
| Table S3. Analysis One Results—Health states estimated from HUI instrument and with comparable utility estimates to published DMD utility estimates .....                                                                    | 6  |
| Figure S1. Differences in utility estimates for health states clinically similar to DMD and existing DMD utility estimates (Relevancy Score $\geq 8$ ). .....                                                                | 9  |
| Figure S2. Differences in utility estimates for health states clinically similar to DMD and existing DMD utility estimates and extracted from US-based cost-effectiveness analysis studies (Relevancy Score $\geq 8$ ) ..... | 10 |
| Figure S3: Distribution of relevancy scores for health states clinically similar to DMD .....                                                                                                                                | 11 |
| Figure S4. Differences in utility estimates for health states clinically similar to DMD and existing DMD utility estimates (Relevancy Score $\geq 6$ ). .....                                                                | 12 |
| Figure S5. Differences in utility estimates for health states clinically similar to DMD and existing DMD utility estimates (Relevancy Score $\geq 4$ ). .....                                                                | 13 |
| Table S4. Summary Statistics for Analysis Two—Utility estimates for health states clinically similar to DMD (Relevancy Scores $\geq 6$ and $\geq 4$ ). .....                                                                 | 14 |

Table S1: Search terms for Analysis Two

|                                                                                                        |
|--------------------------------------------------------------------------------------------------------|
| ambulatory; ambulation; ambulate; ambulating                                                           |
| delayed growth                                                                                         |
| difficulty; trouble; problems [walking; jumping; hopping; standing; rising; lifting; running; jogging] |
| disability; disabled; disabling                                                                        |
| frequent [falling; tripping]                                                                           |
| waddle; waddling                                                                                       |
| gait                                                                                                   |
| enlarged calves                                                                                        |
| sway back; saddle back; arched back                                                                    |
| wheelchair; wheel chair; carriage; scooter                                                             |
| muscle [pain; stiffness; tightness; weakness; wasting]                                                 |
| joint [pain; stiffness; tightness; weakness; wasting]                                                  |
| limp; limping                                                                                          |
| mobility; mobile                                                                                       |
| assistance with walking                                                                                |
| limb function                                                                                          |
| Gower's maneuver                                                                                       |

Table S2: Data extracted on included utility records

| Variable                                               | Description                                                                                                                                                                                                                                                                                                                                       |
|--------------------------------------------------------|---------------------------------------------------------------------------------------------------------------------------------------------------------------------------------------------------------------------------------------------------------------------------------------------------------------------------------------------------|
| Source                                                 |                                                                                                                                                                                                                                                                                                                                                   |
| Publication Reference                                  | Standard APA reference format as for a journal article (Author, Title, Journal, Volume, Issue, Pages, Year)                                                                                                                                                                                                                                       |
| PMID                                                   | PubMed ID of publication                                                                                                                                                                                                                                                                                                                          |
| PubMed Link                                            | Clickable hyperlink to the appropriate PubMed source                                                                                                                                                                                                                                                                                              |
| Publication Year                                       | Self-explanatory                                                                                                                                                                                                                                                                                                                                  |
| Tufts Source                                           | Primary – Authors of the study measured the particular health-state utility<br>Secondary – Authors of the study used a previously published source for health-state utility value                                                                                                                                                                 |
| Secondary Source (PMID)                                | Self-Explanatory                                                                                                                                                                                                                                                                                                                                  |
| Population Studied                                     |                                                                                                                                                                                                                                                                                                                                                   |
| Indication/Disease State                               | Brief description of health state from the CEA Registry                                                                                                                                                                                                                                                                                           |
| Tufts Population                                       | Sample used to measure health-state utility                                                                                                                                                                                                                                                                                                       |
| Gender                                                 | Self-Explanatory                                                                                                                                                                                                                                                                                                                                  |
| Age Range (low - high)                                 | Self-Explanatory                                                                                                                                                                                                                                                                                                                                  |
| Number Patients Studied                                | Self-Explanatory                                                                                                                                                                                                                                                                                                                                  |
| Inclusion Criteria                                     | Self-Explanatory                                                                                                                                                                                                                                                                                                                                  |
| Exclusion Criteria                                     | Self-Explanatory                                                                                                                                                                                                                                                                                                                                  |
| Other Population Details                               | Self-Explanatory<br><i>May include prevalence of the disease or condition, fatality rate, and/or any other details provided by the relevant sources</i>                                                                                                                                                                                           |
| Endpoint                                               |                                                                                                                                                                                                                                                                                                                                                   |
| Endpoint Assessed                                      | Full description of health state (endpoint) from CEA Registry                                                                                                                                                                                                                                                                                     |
| Other Endpoint Details                                 | Self-Explanatory                                                                                                                                                                                                                                                                                                                                  |
| DMD Endpoint: Early ambulatory (Study Objective 1)     | Health state utility value falls within the utility range for DMD early ambulatory stage (0.70–0.76)                                                                                                                                                                                                                                              |
| DMD Endpoint: Late ambulatory (Study Objective 1)      | Health state utility value falls within the utility range for DMD late ambulatory stage (0.61–0.67)                                                                                                                                                                                                                                               |
| DMD Endpoint: Early non-ambulatory (Study Objective 1) | Health state utility value falls within the utility range for DMD early non-ambulatory stage (0.18–0.24)                                                                                                                                                                                                                                          |
| DMD Endpoint: Late non-ambulatory (Study Objective 1)  | Health state utility value falls within the utility range for DMD early ambulatory stage (0.15–0.21)                                                                                                                                                                                                                                              |
| DMD Endpoint: Tier 1 (Study Objective 2)               | Broad categorization of ambulatory condition: (1) Ambulatory, (2) Non-ambulatory                                                                                                                                                                                                                                                                  |
| DMD Endpoint: Tier 2 (Study Objective 2)               | Relevancy score of the health state to 4 major DMD phases [(1) Early ambulatory stage, (2) Late ambulatory stage, (3) Early non-ambulatory stage, (4) Late non-ambulatory stage] or (5) could not be determined.<br><i>Health states will be categorized by its similarity to the clinical outcomes of each of the four ambulatory conditions</i> |
| Utility Value                                          |                                                                                                                                                                                                                                                                                                                                                   |
| Utility Point Estimate                                 | Self-Explanatory                                                                                                                                                                                                                                                                                                                                  |
| Utility Point Estimate Type                            | E.g., mean or median                                                                                                                                                                                                                                                                                                                              |
| Utility Uncertainty Assessed                           | E.g., 95% confidence interval                                                                                                                                                                                                                                                                                                                     |
| Utility Confidence Interval (CI) Low                   | Self-Explanatory                                                                                                                                                                                                                                                                                                                                  |
| Utility CI High                                        | Self-Explanatory                                                                                                                                                                                                                                                                                                                                  |
| Utility Standard Deviation                             | Self-Explanatory                                                                                                                                                                                                                                                                                                                                  |

| Methodology                              |                                                                                                                 |
|------------------------------------------|-----------------------------------------------------------------------------------------------------------------|
| Utility Assessment Method / Instrument   | Broad categorization of measurement method (e.g. Time Trade Off, Standard Gamble, SF-36, EQ-5D, etc.)           |
| Utility Assessment Details               | Specific details that elucidate the methods used, (e.g. Subjects explained TTO with a sample case, then tested) |
| Time Period (over which utility applies) | Self-Explanatory                                                                                                |
| Comments                                 | Any details Tufts team perceives important, but not well-captured in the other variables                        |

Table S3. Analysis One Results—Health states estimated from HUI instrument and with comparable utility estimates to published DMD utility estimates

| <b>DMD Health Phase<br/>(# of health states)</b> | <b>Health State</b>                                                            | <b>CEA Study<br/>Context<br/>(Country)</b> | <b>Utility<br/>Estimate</b> | <b>Utility Assessment<br/>Method</b> | <b>Utility<br/>Assessment<br/>Details</b> |
|--------------------------------------------------|--------------------------------------------------------------------------------|--------------------------------------------|-----------------------------|--------------------------------------|-------------------------------------------|
| Early Ambulatory<br>(n=16)                       | cerebral palsy                                                                 | US                                         | 0.7                         | HUI                                  |                                           |
|                                                  | myocardial infarction                                                          | US                                         | 0.7                         | EQ-5D; HUI                           | HUI - 3                                   |
|                                                  | post-orthotopic liver transplantation                                          | US                                         | 0.7                         | HUI                                  |                                           |
|                                                  | single amputation                                                              | US                                         | 0.71                        | HUI                                  |                                           |
|                                                  | acute bacterial sinusitis with side-effects from antibiotics                   | US                                         | 0.72                        | HUI                                  |                                           |
|                                                  | hepatocellular carcinoma                                                       | US                                         | 0.72                        | EQ-5D; HUI                           | HUI - 3                                   |
|                                                  | post cochlear implant hearing loss                                             | US                                         | 0.72                        | SF-36-12; HUI                        |                                           |
|                                                  | hearing loss                                                                   | US                                         | 0.723                       | HUI                                  |                                           |
|                                                  | chronic hepatitis (f0-f3)                                                      | US                                         | 0.73                        | HUI                                  |                                           |
|                                                  | liver transplant                                                               | US                                         | 0.73                        | EQ-5D; HUI                           | HUI - 3                                   |
|                                                  | compensated cirrhosis                                                          | US                                         | 0.74                        | HUI                                  |                                           |
|                                                  | stage 2 chronic obstructive pulmonary disease + alpha-1 antitrypsin deficiency | US                                         | 0.75                        | HUI                                  | Expert opinion;<br>Rating Scale           |
|                                                  | survivors of cardiopulmonary resuscitation                                     | US                                         | 0.75                        | HUI                                  |                                           |
|                                                  | survivors of salvage cardiac extracorporeal membrane oxygenation               | US                                         | 0.75                        | HUI                                  |                                           |
|                                                  | medulloblastoma tumor, nonmetastatic                                           | US                                         | 0.76                        | HUI                                  | Rating Scale                              |
|                                                  | permanent mild disability from subarachnoid hemorrhage                         | US                                         | 0.76                        | HUI                                  | Expert opinion;<br>Rating Scale           |
|                                                  | hearing impairment (post-implantation)                                         | US                                         | 0.61                        | HUI                                  | HUI-3                                     |
|                                                  | lower bound single mutation multiple mutations                                 | US                                         | 0.61                        | HUI                                  | Rating Scale                              |
|                                                  | osteoporosis-related wrist fracture: emergency room                            | Canada                                     | 0.61                        | HUI                                  | HUI-3; Rating<br>Scale                    |
|                                                  | population with hearing complaints                                             | Netherlands                                | 0.61                        | HUI                                  | HUI-3; Rating<br>Scale                    |
|                                                  | multiple amputations due to bacterial meningitis                               | US                                         | 0.613                       | HUI                                  | HUI-3                                     |
|                                                  | hearing-impaired (severe) - ahl 71-95 db                                       | US                                         | 0.616                       | HUI                                  | HUI-3; Person<br>Trade-Off                |

|                                                                        |                                                                                            |                    |        |                                               |                                                         |
|------------------------------------------------------------------------|--------------------------------------------------------------------------------------------|--------------------|--------|-----------------------------------------------|---------------------------------------------------------|
| Late Ambulatory<br>(n=22)                                              | cd4 count >100 cells/mm <sup>3</sup> , viral load at and no previous serious adverse event | US                 | 0.62   | HUI                                           | HUI-3                                                   |
|                                                                        | hearing aid with large vestibular aqueduct syndrome                                        | US                 | 0.62   | HUI                                           | HUI-3; QOL scores for 7 of 20 patients done by MD proxy |
|                                                                        | otosclerosis detected in hearing aid user                                                  | Netherlands        | 0.62   | HUI                                           | HUI-3; Rating Scale                                     |
|                                                                        | survivor of neisseria meningitides with sequel (chronic sequel)                            | South Africa       | 0.62   | HUI                                           | Standard Gamble; Rating Scale                           |
|                                                                        | colonic necrosis                                                                           | US                 | 0.624  | HUI                                           |                                                         |
|                                                                        | acute illness                                                                              | US                 | 0.627  | HUI                                           | HUI-2                                                   |
|                                                                        | psychosocial problems detected with no hearing aid                                         | Netherlands        | 0.63   | HUI                                           | HUI-3; Rating Scale                                     |
|                                                                        | depression (4 month follow up, no intervention)                                            | US                 | 0.6349 | EQ-5D; HUI                                    | HUI-3                                                   |
|                                                                        | descemet stripping automated endothelial keratoplasty                                      | Netherlands        | 0.64   | HUI                                           | HUI-3; Rating Scale                                     |
|                                                                        | mild pain                                                                                  | Spain              | 0.64   | HUI                                           | HUI-3                                                   |
|                                                                        | using hearing aids                                                                         | Japan              | 0.644  | HUI                                           | HUI-3                                                   |
|                                                                        | clinical pelvic inflammatory disease                                                       | Australia          | 0.65   | HUI                                           | HUI-2; Person Trade-Off                                 |
|                                                                        | colon cancer, last year of life                                                            | United Kingdom     | 0.65   | HUI                                           | HUI-3; Person Trade-Off                                 |
|                                                                        | ixabepilone + capecitabine, stable metastatic breast cancer                                | US                 | 0.65   | HUI                                           | HUI-3; Rating Scale                                     |
|                                                                        | Early and Late Non-Ambulatory<br>(n=9)                                                     | urgent reoperation | US     | 0.66                                          | EQ-5D; HUI                                              |
| depression (post beat the blues intervention)                          |                                                                                            | US                 | 0.6651 | EQ-5D; HUI                                    | HUI-3                                                   |
| moderate Alzheimer's disease, community                                |                                                                                            | US                 | 0.18   | HUI                                           |                                                         |
| expanded disability status scale 4-6: moderate limitations in mobility |                                                                                            | Iran               | 0.18   | HUI                                           |                                                         |
| survivor of colorectal cancer with recurrence                          |                                                                                            | US                 | 0.2    | HUI                                           | Rating Scale                                            |
| moderate Alzheimer's disease                                           |                                                                                            | US                 | 0.21   | HUI                                           |                                                         |
| profoundly deaf                                                        | US                                                                                         | 0.22               | HUI    | Standard Gamble; Time Trade-Off; Rating Scale |                                                         |
| moderate Alzheimer's disease                                           | Japan                                                                                      | 0.16               | HUI    |                                               |                                                         |

|  |                                         |       |       |     |              |
|--|-----------------------------------------|-------|-------|-----|--------------|
|  | clinical dementia rating 2              | Japan | 0.16  | HUI | Rating Scale |
|  | advanced dementia                       | US    | 0.165 | HUI |              |
|  | moderate Alzheimer's disease, community | US    | 0.18  | HUI |              |

Abbreviations: DMD, Duchenne muscular dystrophy; n, Number of identified utility records; US, United States; HUI, Health Utility Index; EQ-5D, EuroQoL 5<sup>th</sup> Dimension;

Figure S1. Differences in utility estimates for health states clinically similar to DMD and existing DMD utility estimates (Relevancy Score  $\geq 8$ )

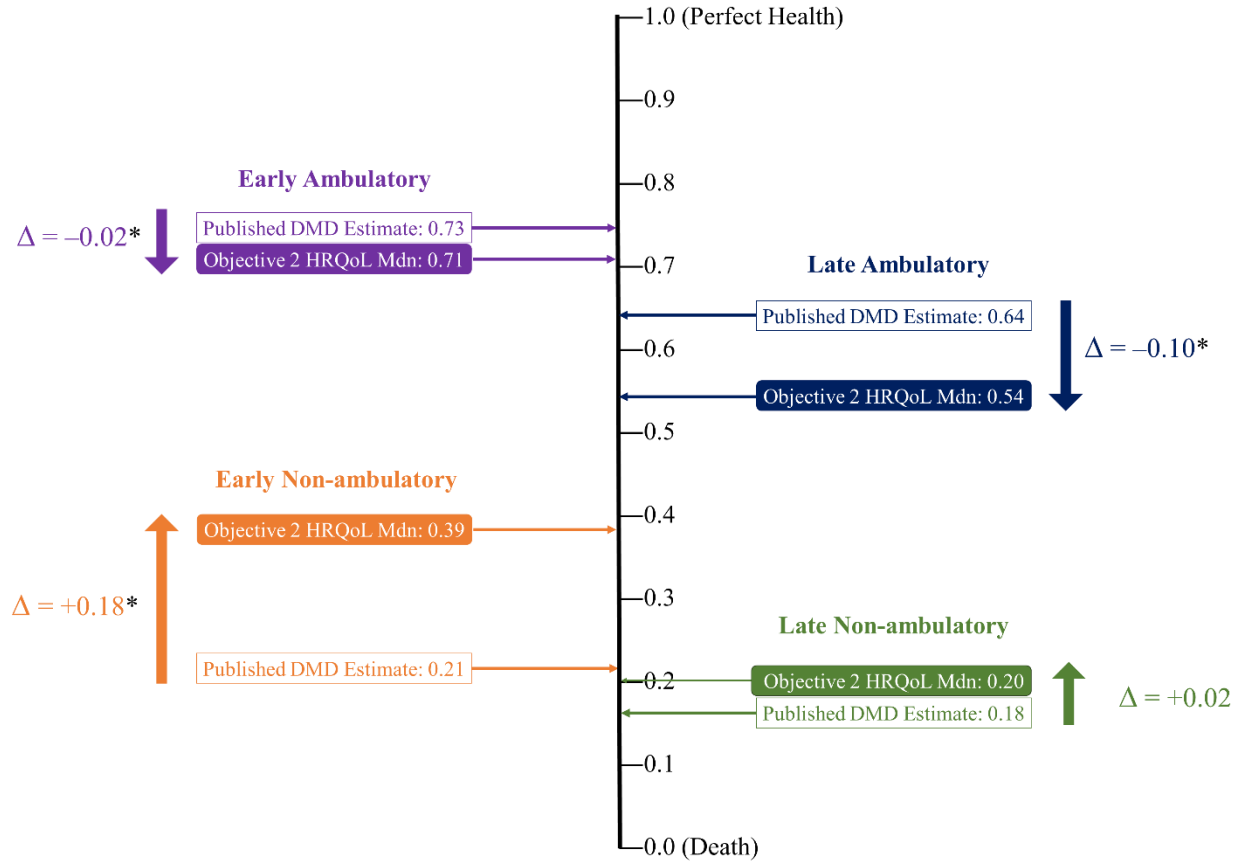

Abbreviations: HRQoL, Health-related quality of Life; Δ, change in utility estimate; Mdn, median

Notes: \*No change compared to relevancy score =10

Figure S2. Differences in utility estimates for health states clinically similar to DMD and existing DMD utility estimates and extracted from US-based cost-effectiveness analysis studies (Relevancy Score  $\geq 8$ )

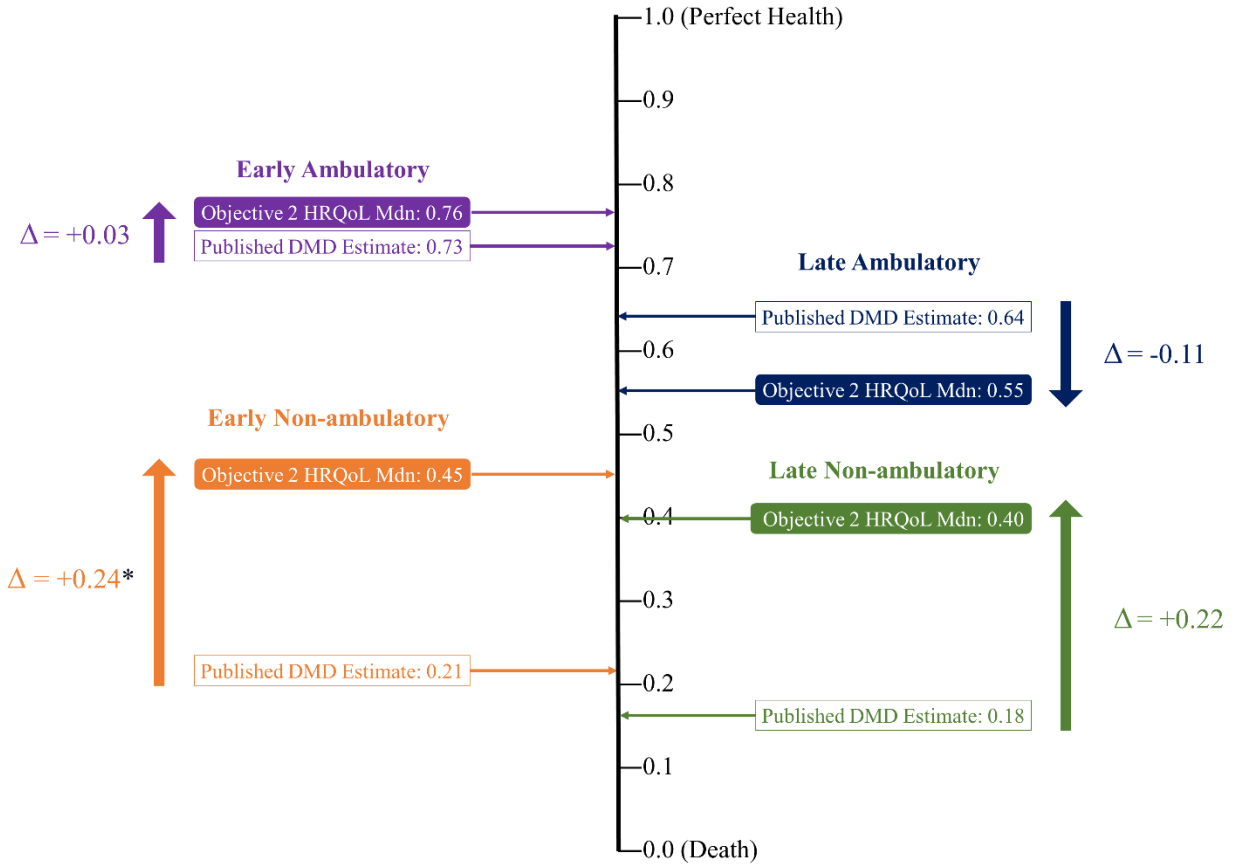

Abbreviations: HRQoL, Health-related quality of Life;  $\Delta$ , change in utility estimate; Mdn, median

Notes: \*No change compared to relevancy score =10;

Figure S3: Distribution of relevancy scores for health states clinically similar to DMD

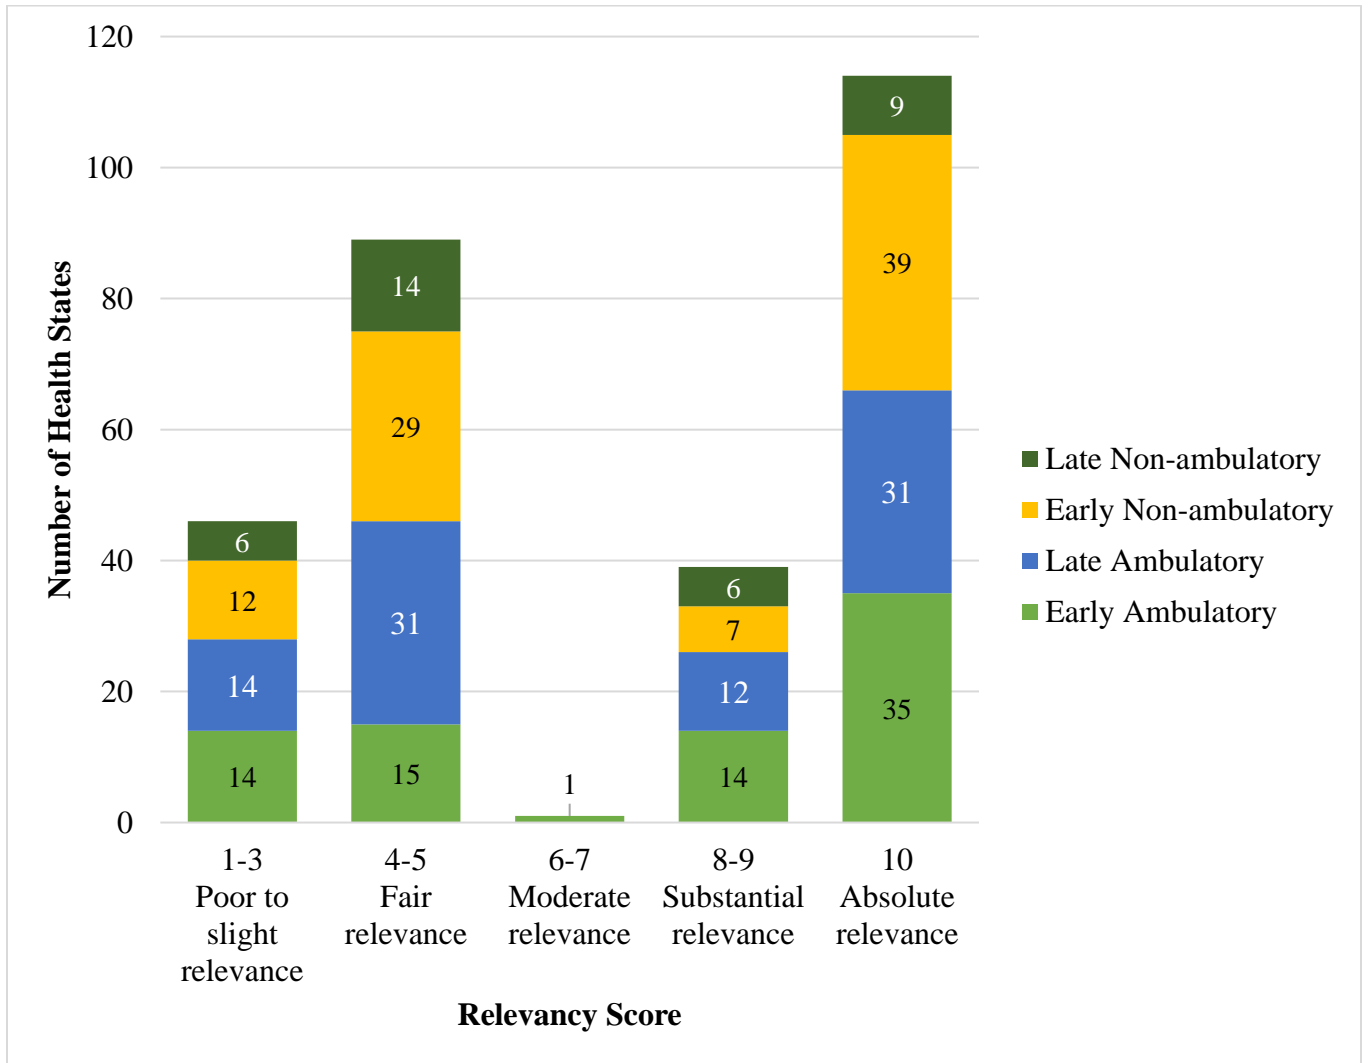

Figure S4. Differences in utility estimates for health states clinically similar to DMD and existing DMD utility estimates (Relevancy Score  $\geq 6$ )

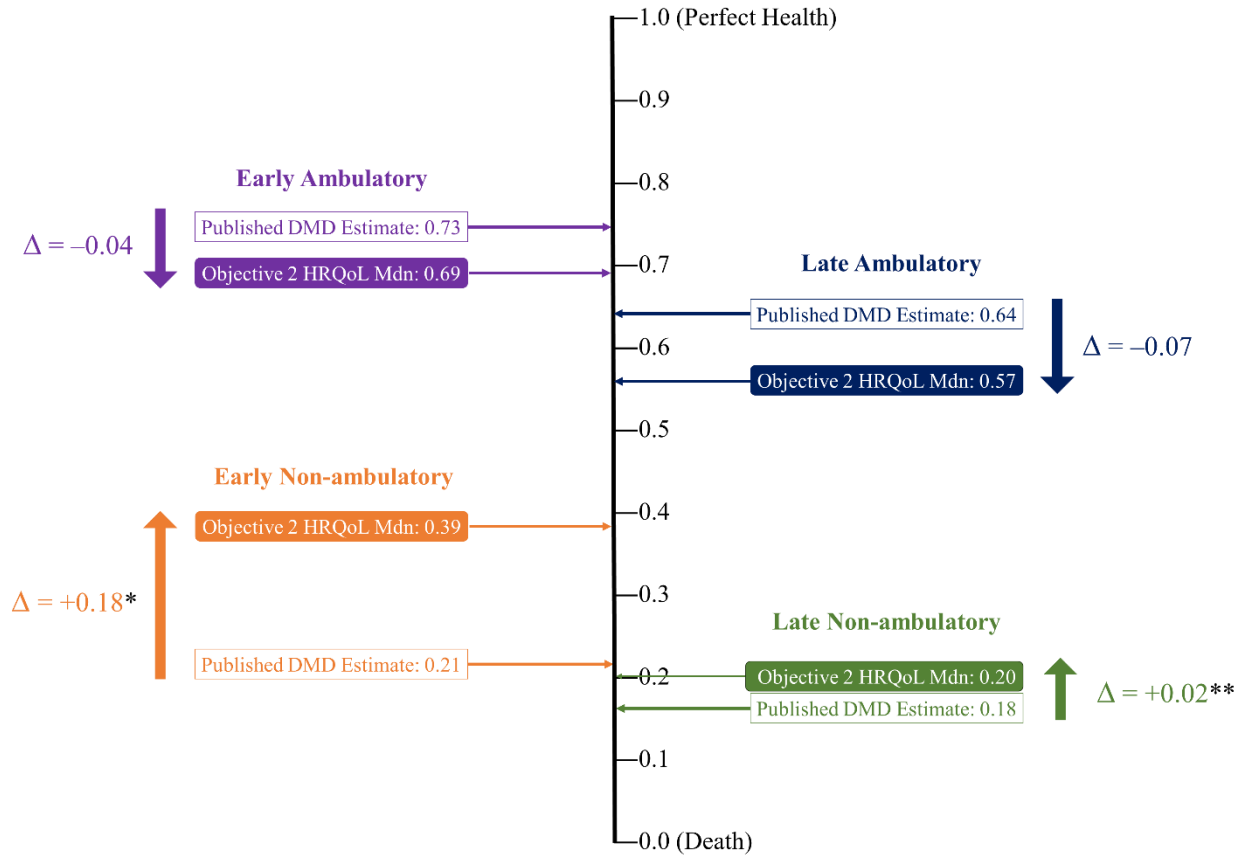

Abbreviations: HRQoL, Health-related quality of Life;  $\Delta$ , change in utility estimate; Mdn, median

Notes: \* No change compared to relevancy score =10; \*\*No change compared to relevancy score  $\geq 8$

Figure S5. Differences in utility estimates for health states clinically similar to DMD and existing DMD utility estimates (Relevancy Score  $\geq 4$ )

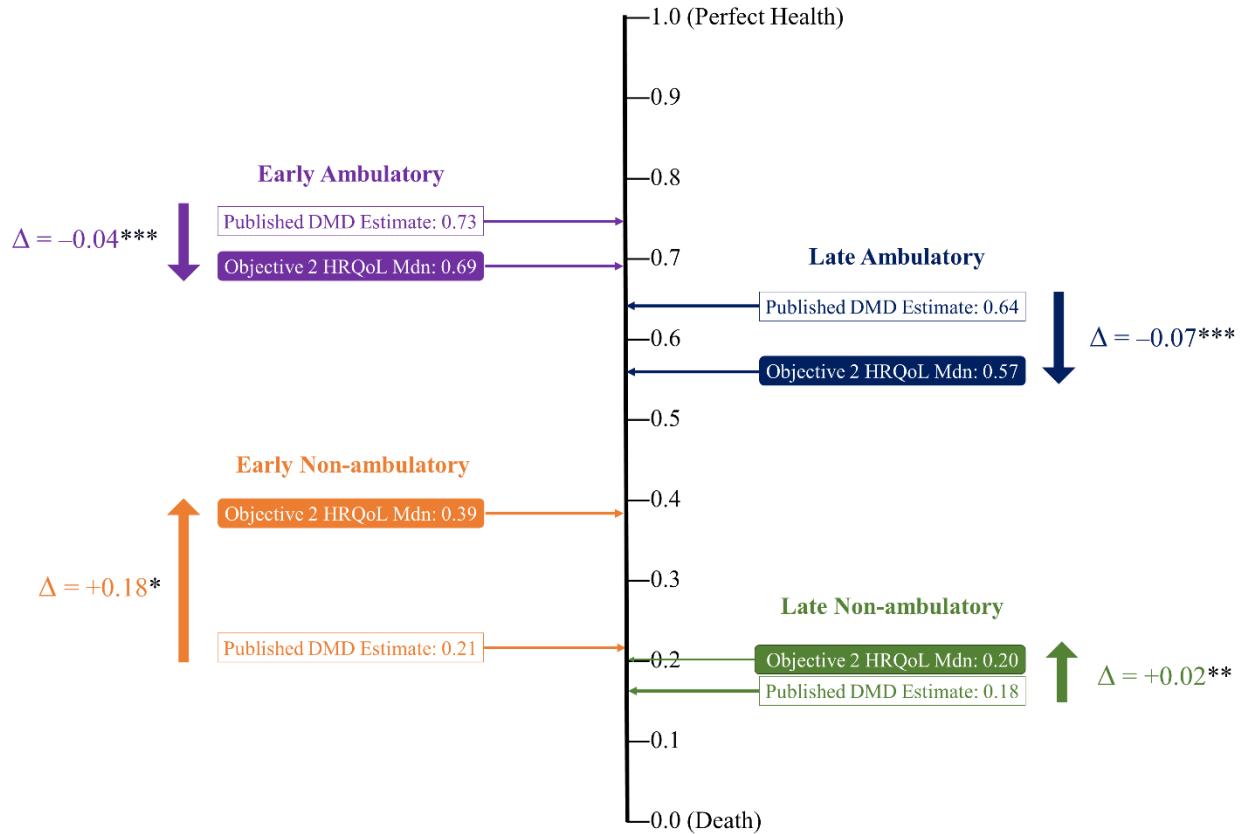

Abbreviations: HRQoL, Health-related quality of Life;  $\Delta$ , change in utility estimate; Mdn, median

Notes: \* No change compared to relevancy score =10; \*\*No change compared to relevancy score  $\geq 8$ ; \*\*\*No change compared to relevancy score  $\geq 6$

Table S4. Summary Statistics for Analysis Two—Utility estimates for health states clinically similar to DMD

(Relevancy Scores  $\geq 6$  and  $\geq 4$ )

| Relevancy Score                                       | DMD Ambulatory phase | Total number of identified utility records | Mean | Median | Standard Deviation | Interquartile Range |
|-------------------------------------------------------|----------------------|--------------------------------------------|------|--------|--------------------|---------------------|
| $\geq 6$ : Moderate to absolute relevance)<br>(n=239) | Early Ambulatory     | 65                                         | 0.66 | 0.69   | 0.18               | 0.65–0.76           |
|                                                       | Late Ambulatory      | 72                                         | 0.54 | 0.57   | 0.19               | 0.49–0.65           |
|                                                       | Early Non-ambulatory | 72                                         | 0.37 | 0.39   | 0.23               | 0.21–0.50           |
|                                                       | Late Non-ambulatory  | 30                                         | 0.23 | 0.18   | 0.20               | 0.05–0.38           |
| $\geq 4$ : Fair to absolute relevance)<br>(n=243)     | Early Ambulatory     | 65                                         | 0.66 | 0.69   | 0.18               | 0.65–0.76           |
|                                                       | Late Ambulatory      | 74                                         | 0.53 | 0.57   | 0.20               | 0.49–0.65           |
|                                                       | Early Non-ambulatory | 75                                         | 0.36 | 0.39   | 0.24               | 0.20–0.50           |
|                                                       | Late Non-ambulatory  | 29                                         | 0.23 | 0.18   | 0.21               | 0.05–0.38           |
